# Supplementary material for: Tuning phenylalanine fluorination to assess aromatic contributions to protein function and stability in cells
Source: Springer Nature journal article supplement (doi:10.1038/s41467-022-35761-w), 2023-01-04

## Supplementary Information

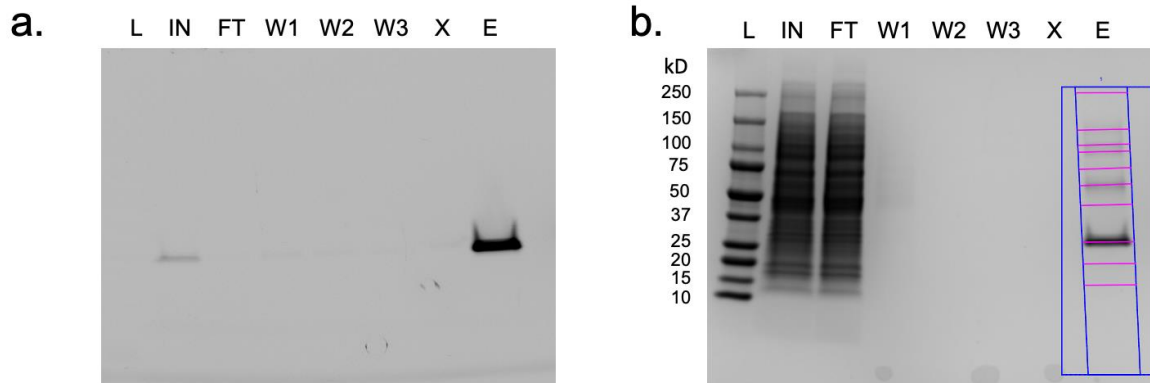

Supplementary Fig 1: Large scale prep and yield of sfGFP bearing penta-F phenylalanine at position N150 using Phe<sub>X-D6</sub>. This large scale purification and gels were performed once. Purification was started from 3.26 g of HEK cells (31 10 cm dishes) **a.** SDS page gel imaged for GFP fluorescence before staining L= Ladder, IN= input, i.e., diluted lysate, FT= flowthrough, W1, W2, W3 = washes, X= empty, E = elution (diluted 1:1 in wash buffer). 30  $\mu$ L of sample loaded per lane from 100 mL (IN/FT), 10 mL (Washes), 1.5 mL (E). Thus,  $\sim$ 1/50 of the elution was run in lane E. **b.** Coomassie stain of the same gel. Buffer exchange and concentration of elution resulted in 240  $\mu$ L of 1.041 abs. Factoring the extinction coefficient of sfGFP\_V5\_HIS and a purity estimate (68%) from densitometry of the bands in Coomassie of E yields a total sfGFP estimate of 110.4  $\mu$ g, or 34  $\mu$ g/g of cells (wet pellet weight).

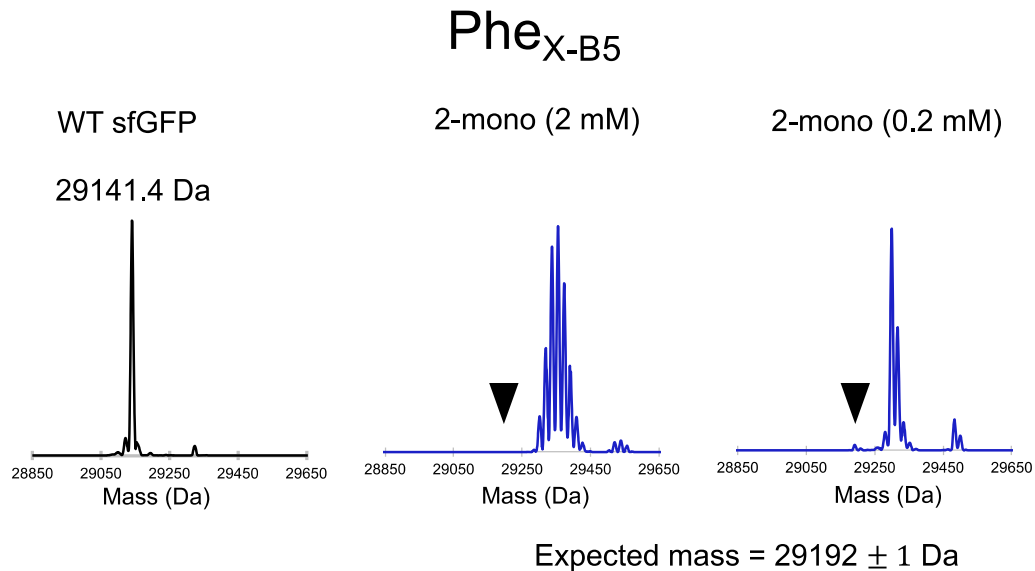

Supplementary Figure 2. Deconvoluted ESI mass spectra for sfGFP-N150TAG expressed with 2-mono fluoro phenylalanine and Phe<sub>X-B5</sub>. Both 2 mM and 0.2 mM concentration of amino acid resulted in extensive incorporation of the amino acid at natural Phe codons, as indicated by masses at multiples of +18 Da. Signal at expected mass is absent in the 2 mM condition and a very small fraction ( $\sim$ 1%) in 0.2 mM condition (black arrowheads).

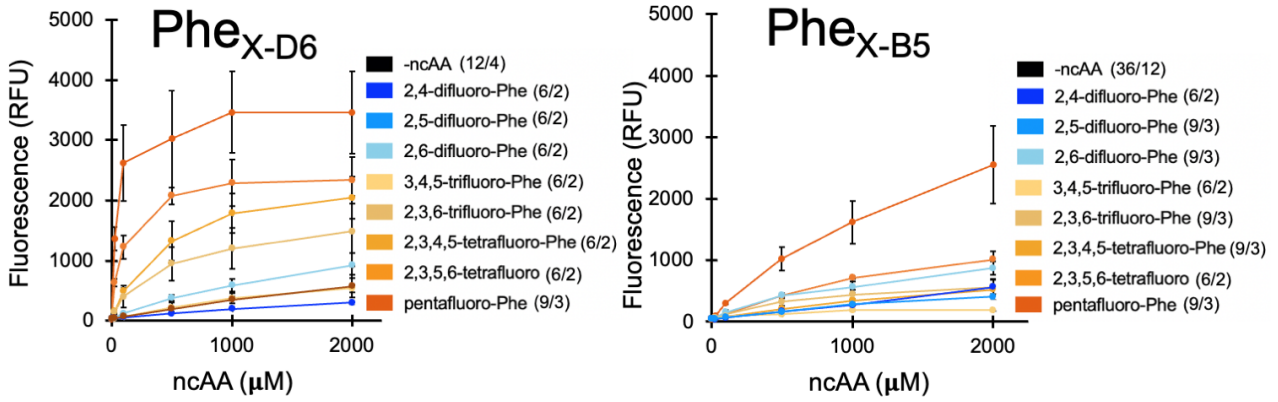

Supplementary Figure 3: GFP lysate values from HEKT cells co transfected with sfGFP150TAG and either Phe<sub>X-D6</sub> (left) or Phe<sub>X-B5</sub> (right) and harvested approximately 24 hours post transfection. In each case n values are given as X/Y where X equals the number of readings from Y independent experiments. Measure of center indicates mean  $\pm$  standard deviation.

WT sfGFP

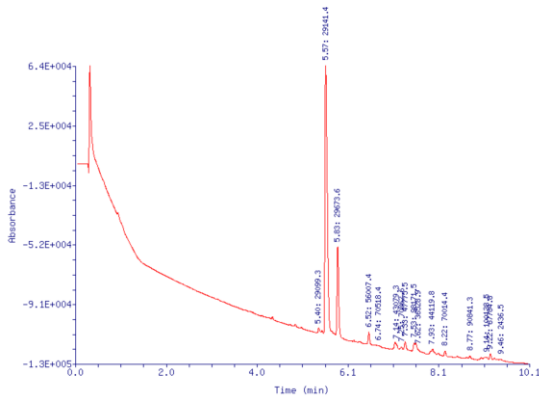

sfGFP N150\_2,3,5,6F Phe (D6)

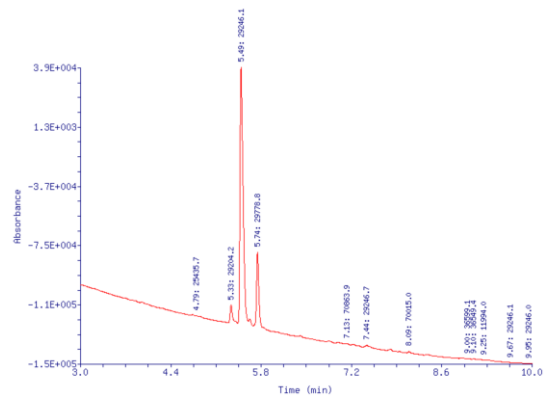

Supplementary Figure 4: UV absorbance of Liquid Chromatography of purified sfGFP samples. Both WT (left) and mutants (in this case Phe<sub>X-D6</sub> encoding 2,3,5,6 tetra-F Phe) eluted as 3 typical peaks for sfGFP, a dominant peak, as well as one at  $\sim$ 42 Da and a third at  $\sim$ 532 Da. The deconvoluted mass spectra for the dominant (center) peaks are shown in the main figures.

|                   | Activation |                  |      |      |      | Steady State Inactivation |                  |      |      |      |
|-------------------|------------|------------------|------|------|------|---------------------------|------------------|------|------|------|
|                   | N          | V <sub>mid</sub> | SEM  | d(x) | SEM  | N                         | V <sub>mid</sub> | SEM  | d(x) | SEM  |
| WT<br>hNav1.5     | 5          | -52.0            | 1.71 | 7.37 | 0.58 | 5                         | -97.8            | 0.85 | 6.76 | 0.45 |
| F1486<br>(2,3,6F) | 8          | -52.8            | 1.56 | 7.31 | 0.66 | 8                         | <b>-104.5</b>    | 1.33 | 7.43 | 0.25 |

Supplementary Table 1: Gating parameters of hNav1.5 variants. **Bolded** = p value of 0.0014 compared to WT, two-sided t-test. P>0.24 for all other comparisons.

---

*E. Coli expression- sfGFP\_N150TAG\_HIS*

MVSKGEELFTGVVPILVELDGDVNGHKFSVRGEGEGDATNGKLTCLKFICTTGKLPVPWPTLVTT  
 LTYGVQCFSRYPDHMKRHDFFKSAMPEGYVQERTISFKDDGTYKTRAEVKFEGDTLVNRIELK  
 GIDFKEDGNILGHKLEYNFNHSH(**TAG**)VYITADKQKNGIKANFKIRHNVEDGSVQLADHYQQNTPI  
 GDGPVLLPDNHYLSTQSVLSKDPNEKRDHMLLEFVTAAGITHGMDELYKGSHHHHHH

*HEK Cell expression- sfGFP\_N150TAG\_V5\_HIS*

MVSKGEELFTGVVPILVELDGDVNGHKFSVRGEGEGDATNGKLTCLKFICTTGKLPVPWPTLVTT  
 LTYGVQCFSRYPDHMKRHDFFKSAMPEGYVQERTISFKDDGTYKTRAEVKFEGDTLVNRIELK  
 GIDFKEDGNILGHKLEYNFNHSH(**TAG**)VYITADKQKNGIKANFKIRHNVEDGSVQLADHYQQNTPI  
 GDGPVLLPDNHYLSTQSVLSKDPNEKRDHMLLEFVTAAGITHGMDELYKGSGKIPNPLLGLD  
 STHHHHHH

Supplementary Figure 5: Protein sequences of sfGFP variants used for expression and purification in this study.

Uncropped blots from data presented in Figure 7

Fig 7a hCFTR

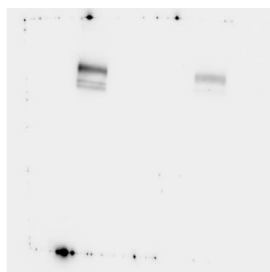

Fig 7b hNav1.5

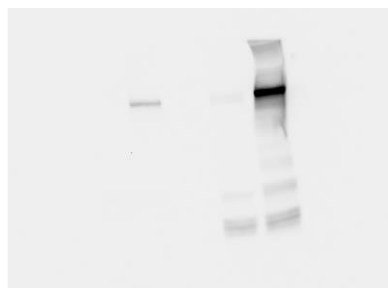

Fig 7a b-actin

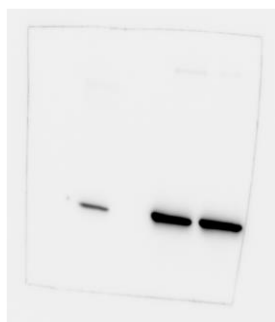

Fig 7b b-actin

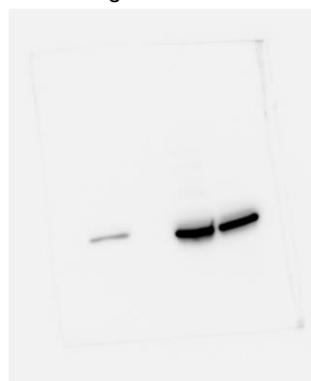

Supplement: MOESM1 [file 41467_2022_35761_MOESM1_ESM.pdf]
